# Supplementary material for: Structure and redshift of Ce3+ emission in anisotropically expanded garnet phosphor MgY2Al4SiO12:Ce3+
Source: Royal Society of Chemistry journal article supplement (doi:10.1039/c6ra00356g), 2016-01-01
Supplement: c6ra00356g1.pdf [file c6ra00356g1.pdf]

## Structure and redshift of Ce<sup>3+</sup> emission in anisotropically expanded garnet phosphor MgY<sub>2</sub>Al<sub>4</sub>SiO<sub>12</sub>:Ce<sup>3+</sup>

Zaifa Pan,<sup>\*,a</sup> Weiqiang Li,<sup>a,b</sup> Yu Xu,<sup>a,b</sup> Qingsong Hu<sup>a</sup> and Yifan Zheng<sup>\*,b</sup>

<sup>a</sup>College of Chemical Engineering, Zhejiang University of Technology, Hangzhou 310014, China

<sup>b</sup>Research center of Analysis and measurement, Zhejiang University of Technology, Hangzhou 310014, China

**\*Corresponding author:**

Zaifa Pan, E-mail: [panzaifa@zjut.edu.cn](mailto:panzaifa@zjut.edu.cn). Phone: 0086-571-88320797

Yifan Zheng, E-mail: [zhengyifan@zjut.edu.cn](mailto:zhengyifan@zjut.edu.cn). Phone: 0086-571-88320961

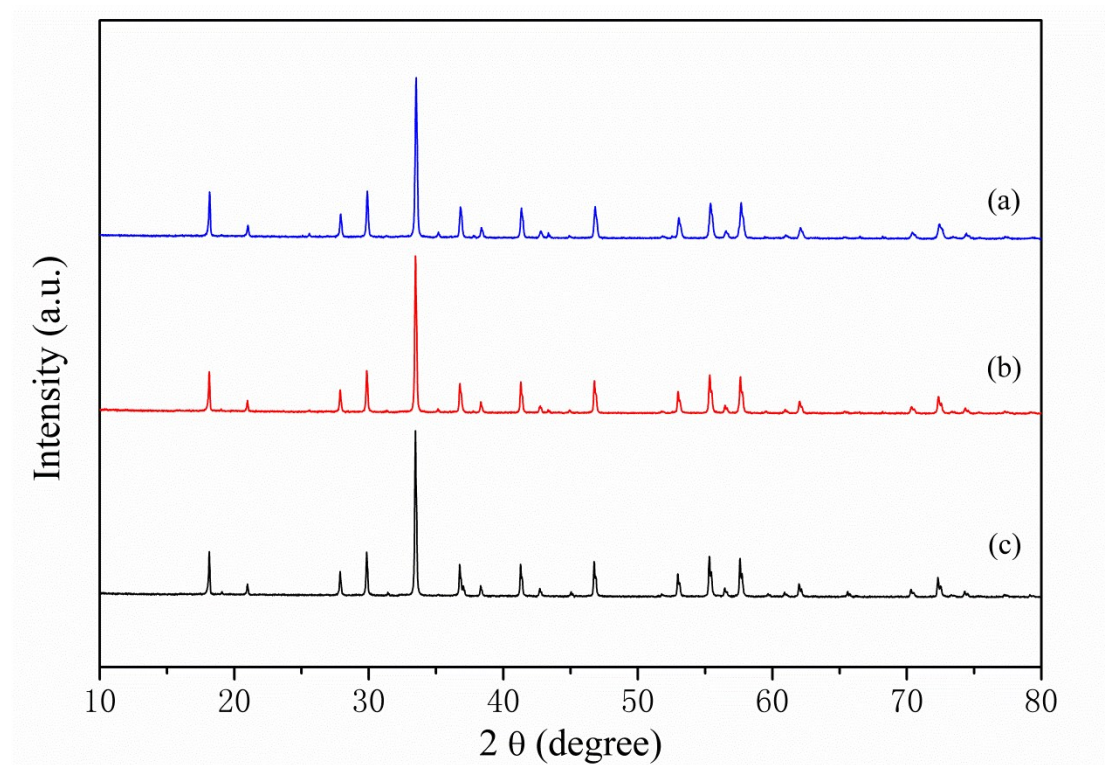

Figure S1 XRD patterns of MYAS:0.06Ce<sup>3+</sup> synthesized by solid state reaction at 1400 °C (a), 1350 °C (b) and 1300 °C (c).

Table S1 Fractional coordinates, site occupation factors (S.O.F) and thermal vibration parameters of MYAS and YAMS.

| atom                                                                                                                                                                                                                                                                                                                                                                                                                          | site | x      | y      | x     | Occu. | U(Å <sup>2</sup> ) |
|-------------------------------------------------------------------------------------------------------------------------------------------------------------------------------------------------------------------------------------------------------------------------------------------------------------------------------------------------------------------------------------------------------------------------------|------|--------|--------|-------|-------|--------------------|
| <b>MgY<sub>2</sub>Al<sub>4</sub>SiO<sub>12</sub></b>                                                                                                                                                                                                                                                                                                                                                                          |      |        |        |       |       |                    |
| Y                                                                                                                                                                                                                                                                                                                                                                                                                             | 24c  | 0.25   | 0.125  | 0     | 0.667 | 0.0172             |
| Mg                                                                                                                                                                                                                                                                                                                                                                                                                            | 24c  | 0.25   | 0.125  | 0     | 0.333 | 0.0172             |
| Al                                                                                                                                                                                                                                                                                                                                                                                                                            | 16a  | 0      | 0      | 0     | 1.0   | 0.0387             |
| Al                                                                                                                                                                                                                                                                                                                                                                                                                            | 24d  | 0.25   | 0.375  | 0     | 0.667 | 0.0375             |
| Si                                                                                                                                                                                                                                                                                                                                                                                                                            | 24d  | 0.25   | 0.375  | 0     | 0.333 | 0.0375             |
| O                                                                                                                                                                                                                                                                                                                                                                                                                             | 96h  | 0.0304 | 0.0538 | 0.652 | 1.0   | 0.0399             |
| <b>Y<sub>3</sub>Al<sub>3</sub>MgSiO<sub>12</sub></b>                                                                                                                                                                                                                                                                                                                                                                          |      |        |        |       |       |                    |
| Y                                                                                                                                                                                                                                                                                                                                                                                                                             | 24c  | 0.25   | 0.125  | 0     | 1.0   | 0.0125             |
| Mg                                                                                                                                                                                                                                                                                                                                                                                                                            | 16a  | 0      | 0      | 0     | 0.5   | 0.00913            |
| Al                                                                                                                                                                                                                                                                                                                                                                                                                            | 16a  | 0      | 0      | 0     | 0.5   | 0.00913            |
| Al                                                                                                                                                                                                                                                                                                                                                                                                                            | 24d  | 0.25   | 0.375  | 0     | 0.667 | 0.0196             |
| Si                                                                                                                                                                                                                                                                                                                                                                                                                            | 24d  | 0.25   | 0.375  | 0     | 0.333 | 0.0196             |
| O                                                                                                                                                                                                                                                                                                                                                                                                                             | 96h  | 0.250  | 0.055  | 0.640 | 1.0   | 0.0339             |
| <sup>a</sup> Space group: Ia-3d(no.230);; $\alpha=\beta=\gamma=90^\circ$ ; T=298K; Z=8;Cu K $\alpha$ , $\lambda=1.5418$ nm; lattice parameters:<br>MgY <sub>2</sub> Al <sub>4</sub> SiO <sub>12</sub> :a = 11.960 Å, V = 1710.69 Å <sup>3</sup> Rwp=3.91%, Rp=2.51%, $\chi^2=5.810$ ;<br>Y <sub>3</sub> Al <sub>3</sub> MgSiO <sub>12</sub> : a = 12.016 Å, V = 1734.92 Å <sup>3</sup> Rwp=11.74%, Rp=7.27%, $\chi^2=9.787$ . |      |        |        |       |       |                    |
